# Supplementary material for: RAFT emulsion polymerization of styrene mediated by core cross-linked star (CCS) polymers
Source: Royal Society of Chemistry journal article supplement (doi:10.1039/c2py21074f), 2013-01-01
Supplement: c2py21074f.pdf [file c2py21074f.pdf]

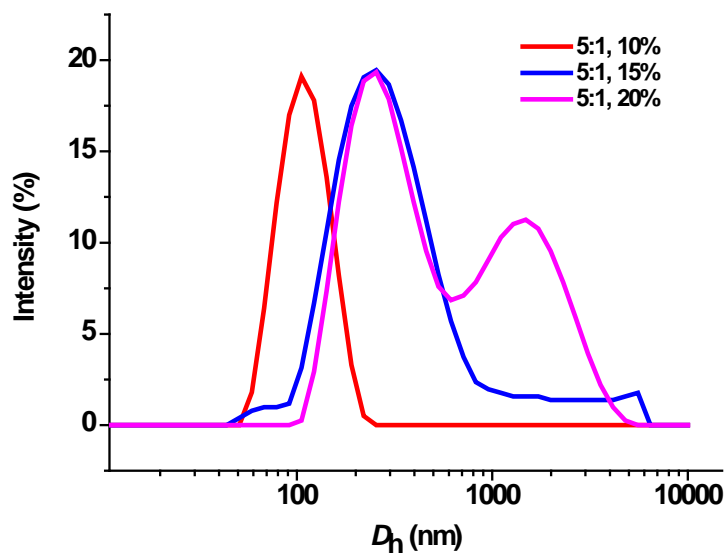

**Fig. S1** DLS results of colloids synthesized at different solid contents while maintaining the mass ratio of styrene/CCS at 5:1.
